# Supplementary material
Source: PubMed Central journal article supplement (PMC3529089)
Supplement: 1214400109_pnas.201214400SI.pdf [file 1214400109_pnas.201214400SI.pdf]

# Supporting Information

Park et al. 10.1073/pnas.1214400109

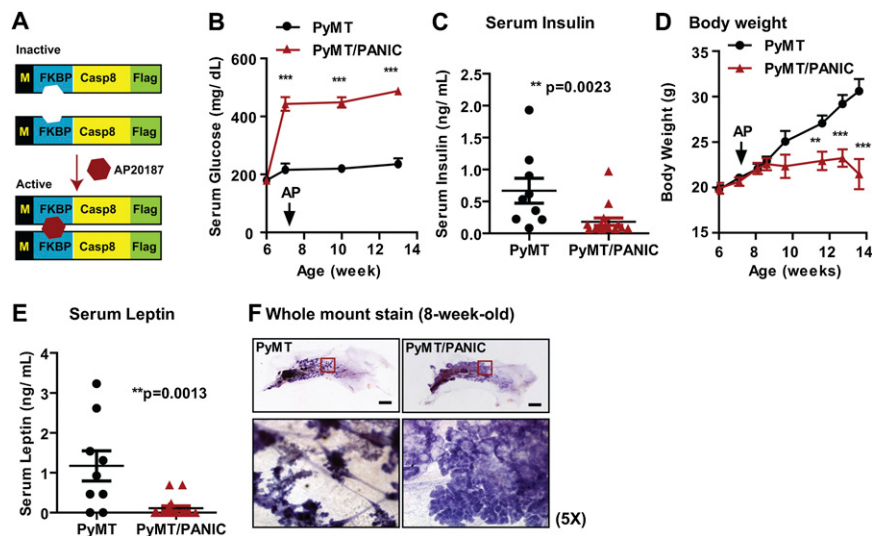

**Fig. S1.** Metabolic profiles of PyMT/PANIC mice compared with PyMT mice. (A) Schematic for the hyperglycemia induction in PANIC-ATTAC mice. Caspase8 cassettes are activated upon dimerize treatment (AP20187; Clontech). (B) Serum glucose levels (feeding condition) were determined for PyMT/PANIC compared with PyMT. Hyperglycemia in PyMT/PANIC was induced by AP20187 injection (0.5  $\mu$ g/g, i.p., 5 d) and maintained over the tumor progression ( $n = 9-16$  per group). \*\*\* $P < 0.001$  vs. PyMT by two-way ANOVA. (C) Serum insulin levels were significantly decreased in PyMT/PANIC compared with PyMT because of concomitant increase of serum glucose levels ( $n = 9-16$  per group). \*\* $P = 0.0023$  vs. PyMT by unpaired Student's *t* test. (D) Body weight was determined over the tumor progression ( $n = 9-16$  per group). \*\* $P < 0.01$  and \*\*\* $P < 0.001$  vs. PyMT by two-way ANOVA. (E) Serum leptin reflecting body fat mass was determined ( $n = 9-16$  per group). \*\* $P = 0.0013$  vs. PyMT by unpaired Student's *t* test. (F) Early-stage of tumor progression was determined by whole mount staining of mammary gland tissues at 8-wk-old PyMT/PANIC compared with PyMT. (Scale bars: 50 mm.) Higher magnification for squared boxes is presented in Lower.



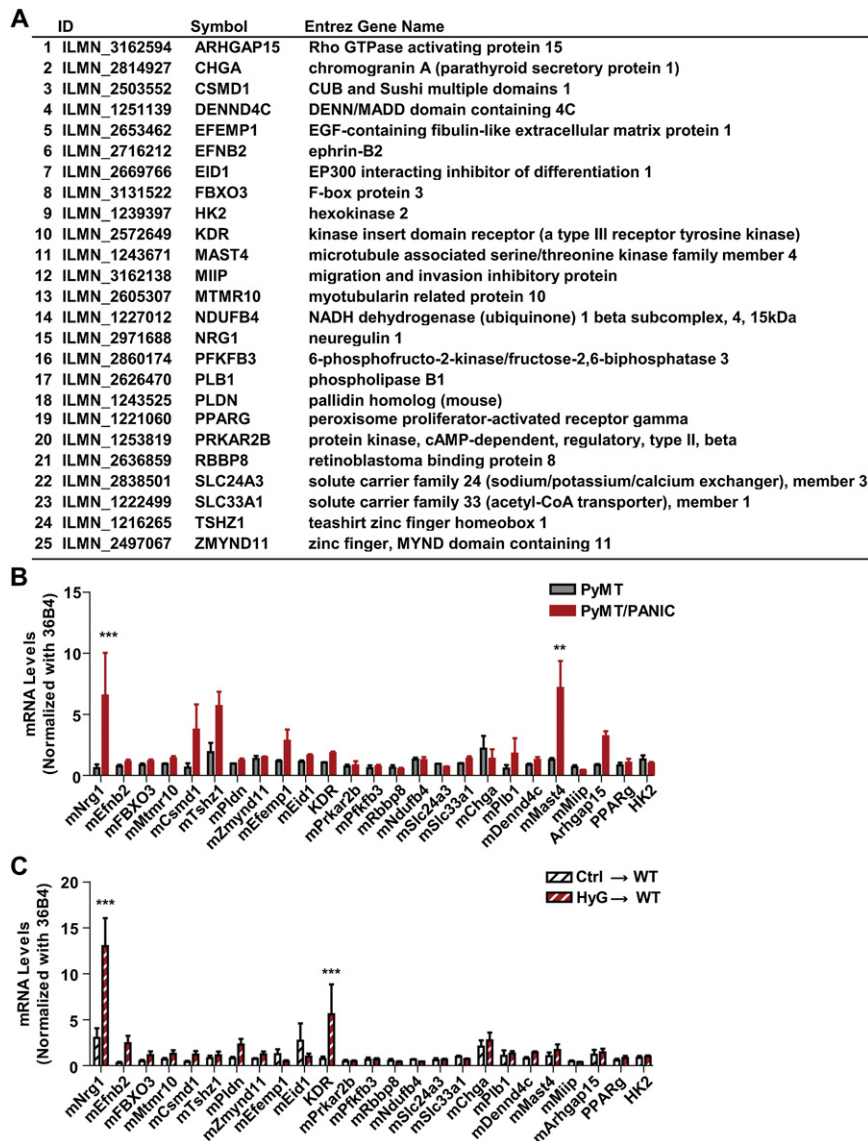

**Fig. S3.** Comparison microarray data with FAIRE-seq data. (A) List of candidate molecules. (B) Quantitative (qRT-PCR), revealing increased *Nrg1* mRNA levels in tumor tissues of PyMT mice upon hyperglycemia challenge ( $n = 8$  per group). \*\*\* $P < 0.001$ , \*\* $P < 0.01$  vs. PyMT by two-way ANOVA. (C) qRT-PCR, showing that consistent increase of *Nrg1* mRNA levels in HyG tumors than Ctrl tumors ( $n = 6$  per group). Results were normalized to 36B4 and represented as mean  $\pm$  SEM \*\*\* $P < 0.001$  vs. Ctrl  $\rightarrow$  WT by two-way ANOVA.

#### *Nrg1*/NRG1 enhancer sequences

```

Mm_Nrg1_Enhancer  AACCTATCAGATTTCCCTCTCTTACGTCANACATTTCCATCCCTCA--TCCTCCTGTTCTGCAGAGAA
Hs_NRG1_Enhancer  AACCTATCAGATTTCCCTCTCTTACGTCANACATTTCCATCCCTCA--TCCTCCTGTTCTGCAGAGAA

Mm_Nrg1_Enhancer  CAGAAAACAGGTCATCCGAGGTATCAAAACATTAATAACCAATTTCACAATTACTTGTGGCCTTGATATACTT
Hs_NRG1_Enhancer  CAGAAAACAGGTCATCCGAGGTATCAAAACATTAATAACCAATTTCACAATTACTTGTGGCCTTGATATACTT

Mm_Nrg1_Enhancer  TCTGAATTCACACCGGATAGCTGCTCTCACTTCTCTCCCATTTCTAGGCTTCCTTTTATGAAAGTGGGG
Hs_NRG1_Enhancer  TCTGAATTCACACCGATAGCTGCTCTCACTTCTCTCCCATTTCTAGGCTTCCTTTTATGAAAGTGGGG

Mm_Nrg1_Enhancer  CCTCGTTAGTACCCGACGCTTAAGGAGAAAGAACTGGCAAGCCCTAGATCTACATGCCTAAGGCTATGGAAT
Hs_NRG1_Enhancer  CCTCTTCACTTACCCGCTCTTAAGGAGCAAACTGGCAAGGATCCAGATCTACATGCCTAAGGCTATGGAAT

Mm_Nrg1_Enhancer  GCACACCTTTTCTTTCTTACGTCAGATGCAAAATATTAACATGAATCATCTGAGCTGGAGCTCTCTTA
Hs_NRG1_Enhancer  GCACACCTTTTCTTTCTTACGTCAGATGCAAAATATTAACATGAATCATCTGAGCTGGAGCTCTCTTA

Mm_Nrg1_Enhancer  AGCAGACACTGGCAGGCTTGCAGAACTTTCTTTTGTCAATGCTGGATAATCAGGGCCCTGGAGGATATTTAC
Hs_NRG1_Enhancer  AGCTAATATGGCNAACCTTGGAGAGCTTTCTTTTGTCAATGCTGGATAATCAGGGCCCTGGAGGATATTTAC

Mm_Nrg1_Enhancer  TCAACTCTGATCAGG--CTCTCTCTCTCTTTCCTGCAAGTGCCTCTGGAAAGTCTCAG--CTCTCGATTA
Hs_NRG1_Enhancer  TCAACTCTGATCAGGACTCTCTCTCTCTTTCCTGCAAGTGCCTCTGGAAAGTCTCAGCTCTCGATTA

Mm_Nrg1_Enhancer  TTTTCTCTAGGATTCACCTGAGCTTTTCCATATTCGGGATAAGTGGAAAGCTTTCACATTCCAATCCACACATT
Hs_NRG1_Enhancer  TTTTCTCTAGGATTCACCTGAGCTTTTATATATAGGATAAGTGGAAAGCTTTCATGATTCCAATCCAGGACATT

```

□ AP1 binding motif

**Fig. S4.** Homology between mouse and human NRG1 enhancer sequences. Square indicates conserved AP-1 binding motif.

### A Mouse Nrg1 mRNA sequences amplified in HyG-tumors compared to Ctrl-tumors

>uc009ljn.1\_mm9\_1\_1 240 0 0 chr8:32928500 - 32928739 -

ATGGACAGCAACCAAGTTCTGTGAGCAGTAAGTCAAGAGTGAAGAGAGTAGGTGAA  
GATACACCATTCCTGGGCATACAGAACCCCTGGCAGCCAGCCTTGAGGTGGCCCTGCCTTCGCTCTGGCT  
GAGAGCAGGACTAACCCAGCAGGCCCTTCTCACACAGGAAGATTACAGGCCAGGCTGTAGTGTAAAT  
CGCTAACCAAGACCTATTGCTGTATAA

### B Homologous sequences in human NRG1 mRNA

>uc009ljn.1\_hg18\_1\_1 240 0 0 chr8:32741223 - 32741462 +

GTGGACAGCAACCAAGCTCCAGAGCAGTAAGTCAAGAGTGAAGAGAGTAGGTGAA  
GTAGGTGAAGATACGCTTCTGGGCATACAGAACCCCTGGCAGCCAGCCTTGAGGTGGCCCTGCCTTCGCTCTGGCT  
ACCTGCTTCCGCTGGCTGACAGCAGGACTAACCCAGCAGGCCCTTCTCACACAGGAAG  
AAATCCAGGCCAGGCTGTAGTGTAAATGCTAACCAAGACCTATTGCTGTATAA

### C Human NRG1 isoforms

| Accession      | Description                          | E-value | Max identity |
|----------------|--------------------------------------|---------|--------------|
| NP_001153473.1 | pro-neuregulin-1, isoform HRG-beta1d | 1e-30   | 100%         |
| NP_001153476.1 | pro-neuregulin-1, isoform HRG-beta1c | 2e-30   | 100%         |
| NP_001153471.1 | pro-neuregulin-1, isoform HRG-beta1b | 3e-30   | 100%         |
| NP_039250.2    | pro-neuregulin-1, isoform HRG-beta1  | 4e-30   | 100%         |
| NP_039251.2    | pro-neuregulin-1, isoform HRG-beta2  | 5e-30   | 100%         |
| NP_039258.1    | pro-neuregulin-1, isoform HRG-alpha  | 9e-30   | 100%         |

**Fig. S5.** Mouse Nrg1 mRNA sequences amplified under hyperglycemic conditions and analogous human isoforms. RNA-seq analysis was performed with RNA samples subjected from the mouse HyG versus Ctrl tumors by the sequencing facility in the McDermott Center for Human Growth and Development, University of Texas Southwestern Medical Center. (Illumina Hi-Seq2000, SOLiD 5000xl). The murine Nrg1 isoforms have not yet been well defined, so a series of comparative alignments with human homologous are shown. (A) Mouse mRNA sequence up-regulated in HyG-tumors compared with Ctrl-tumors. (B) Human homologous sequences corresponding to mouse Nrg1 mRNA. (C) Blastx analysis (<http://blast.ncbi.nlm.nih.gov>) with human NRG1 homologous sequences indicates that several isoforms of heregulin are up-regulated in response to hyperglycemia.

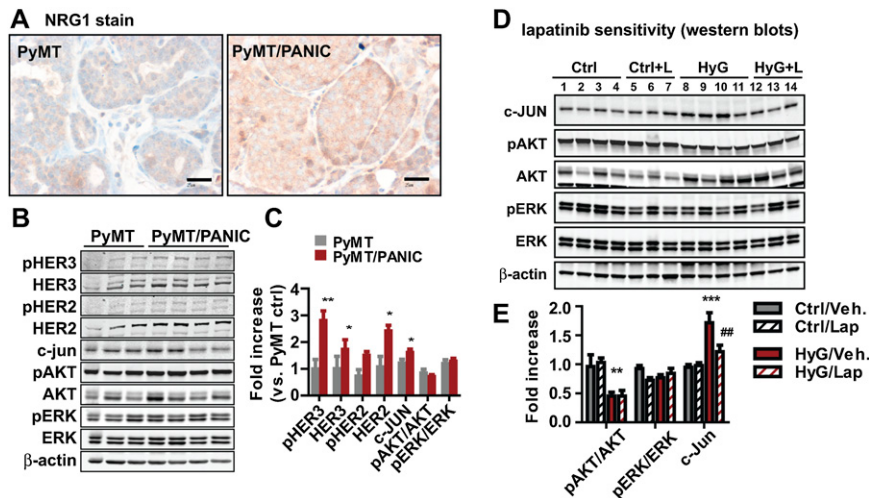

**Fig. S6.** Nrg1 acquisition in tumor tissues of PyMT/PANIC compared with PyMT. (A) Nrg1 immunostaining, showing higher Nrg1 signal in tumor tissues from PyMT/PANIC compared with those from PyMT mice. (Scale bars: 25  $\mu$ m.) (B) Activation of HER receptors in tumors from PyMT/PANIC in comparison with those in PyMT. c-Jun levels were increased in PyMT/PANIC, whereas the effects on AKT and ERK activation was limited.  $\beta$ -actin was used as a loading control. (C) Quantified results for Western blots were normalized to  $\beta$ -actin and represented as mean  $\pm$  SEM. Two independent cohort experiments were performed. \* $P$  < 0.05, \*\* $P$  < 0.01 vs. PyMT by two-way ANOVA. (D) Western blotting, showing an inefficient inhibition of AKT and ERK activation by a RTK inhibitor, lapatinib treatment (100 mg/kg per day by oral gavage) for both Ctrl and HyG tumor-bearing mice. c-Jun is consistently increased in HyG tumors compared with Ctrl tumors.  $\beta$ -actin was used as a loading control. (E) Quantified results represent as mean  $\pm$  SEM,  $n$  = 5–6 per group. \*\* $P$  < 0.01, \*\*\* $P$  < 0.001 Ctrl-veh vs. HyG-veh; # $P$  < 0.05, HyG-veh vs. HyG-lap by unpaired Student's  $t$  test.

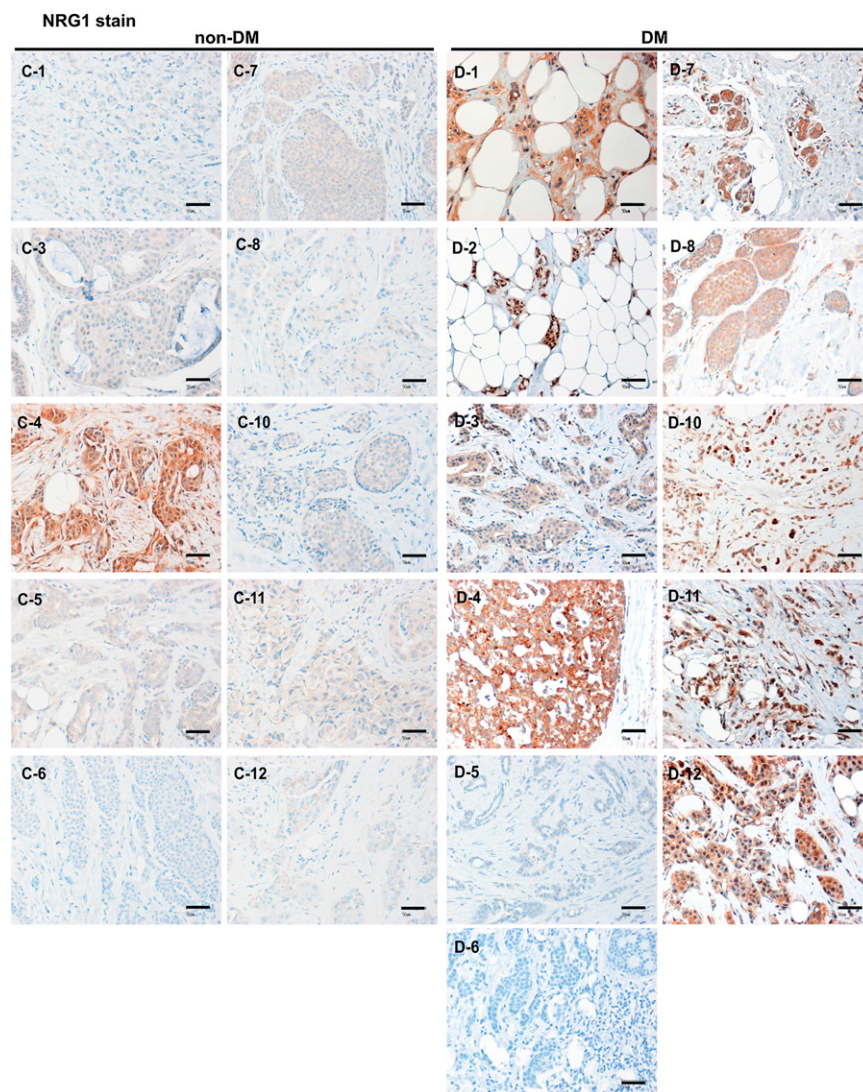

**Fig. S7.** NRG1 immunostaining for DM-diagnosed breast cancer patients compared with control patients. Paraffin-embedded tumor samples were immunostained with anti-NRG1 (H210; Santa Cruz Biotechnology). Hematoxylin was used for costaining. (Scale bars: 50  $\mu$ m.)

**Table S1. Fasting glucose levels and cancer marker status for human patients**

| Group                   | ID   | Tumor grade | Glucose, mg/dL | NRG1 | HER3 | ER | PR | HER2 | P53 | Ki-67, % |
|-------------------------|------|-------------|----------------|------|------|----|----|------|-----|----------|
| Non-DM ( <i>n</i> = 12) | C-1  | 1           | 87             | 0    | 0    | +  | —  | —    | —   | 12       |
|                         | C-2  | 1           | 88             | 0    | 0    | +  | +  | —    | —   | 5        |
|                         | C-3  | 1           | 89             | 0    | 0    | +  | +  | —    | —   | 7        |
|                         | C-4  | 1           | 90             | 3+   | 0    | +  | +  | —    | —   | 9        |
|                         | C-5  | 1           | 85             | 0    | 0    | +  | +  | —    | —   | 2        |
|                         | C-6  | 1           | 88             | 0    | 2+   | +  | +  | —    | +   | 16       |
|                         | C-7  | 1           | 84             | 0    | 0    | +  | +  | —    | —   | 47       |
|                         | C-8  | 2           | 84             | 0    | 0    | —  | —  | —    | +   | 16       |
|                         | C-9  | 2           | 84             | 0    | 0    | +  | +  | —    | —   | 18       |
|                         | C-10 | 2           | 88             | 0    | 0    | +  | +  | —    | —   | 30       |
|                         | C-11 | 3           | 85             | 0    | 0    | —  | —  | —    | +   | 54       |
|                         | C-12 | 3           | 89             | 0    | 0    | —  | —  | —    | +   | 38       |
| DM( <i>n</i> = 13)      | D-1  | 1           | 145            | 2+   | 2+   | +  | —  | —    | —   | 10       |
|                         | D-2  | 1           | 130            | 3+   | 0    | +  | +  | —    | +   | 9        |
|                         | D-3  | 1           | 136            | 1+   | 0    | +  | —  | —    | —   | 14       |
|                         | D-4  | 1           | 449            | 3+   | 1+   | +  | +  | —    | —   | 6        |
|                         | D-5  | 1           | 163            | 0    | 0    | +  | +  | —    | —   | 20       |
|                         | D-6  | 2           | 130            | 0    | 0    | +  | +  | —    | —   | 11       |
|                         | D-7  | 2           | 201            | 1+   | 1+   | +  | +  | —    | —   | 5        |
|                         | D-8  | 2           | 349            | 1+   | 0    | +  | +  | —    | —   | 14       |
|                         | D-9  | 2           | 154            | 3+   | 2+   | +  | +  | —    | —   | 16       |
|                         | D-10 | 2           | 184            | 3+   | 0    | +  | +  | —    | +   | 31       |
|                         | D-11 | 2           | 194            | 2+   | 0    | +  | +  | —    | —   | 15       |
|                         | D-12 | 2           | 370            | 2+   | 0    | +  | +  | —    | +   | 19       |
|                         | D-13 | 2           | 135            | 3+   | 2+   | +  | +  | —    | —   | 28       |

HER2 negative, control (*n* = 12), and DM-diagnosed (*n* = 13) human breast cancer patient samples were included in this analysis. NRG1 and HER3 status were determined by immunohistochemistry. Scoring for NRG1 and HER3 staining intensity represents as 0 (negative) to 3 (strong). Other marker proteins such as ER (estrogen receptor), PR (progesterone receptor), HER2, p53, and Ki-67 were also assessed by immunohistochemistry. Specimens highlighted in red are represented in Fig. 5A.

| Gene ID      | Sense (5' to 3')          | Antisense (5' to 3')     |
|--------------|---------------------------|--------------------------|
| Arhgap15     | AATCCAAGTTGTGGGTCCCTGGAG  | TCAGTGCTCCGGTGACGACGCT   |
| Chga         | CCGCCACCATCACCCTGTT       | GGGCAAAAACCTTGCCCGGCG    |
| Csmd1        | CCCACTCGCTGGCTCTCTCTCCAG  | GGATGGCTCTCTCTCGGATGCG   |
| Dennd4c      | TGGGGAGCACACAGTCTTCGTCAG  | TGCTCTTTCAGGGGCGTGACCA   |
| Efemp1       | GGGGGCTTCCGCTGTTACCC      | GGCAGCTCCCGGCACATAGTG    |
| Efnb2        | ACAGCGTCTTCTGCCCGCAC      | CCTACCGTGTCTCCCCGGG      |
| Eid1         | AGGTGTTCTCGCAACCGCG       | GGCTCTTCTCACACCGCGCC     |
| FBXO3        | TAGAGGCCGAGACGGGGCTG      | TCCGAGGACACCTGGGCTCC     |
| HK2          | TGCCAAGCGTCTCCATAAGG      | GGAGGAAGCGGACATCCACA     |
| KDR          | CAGACTGTGTCCCGCAGCCG      | CACAGAGGCGGTATGCGCCC     |
| Mast4        | GGTTTAGCGGGAGAAGCCGCAG    | TTGGACCACAGGAGCGCGTC     |
| Miip         | TTTCGGGCGGAGAGCGTTGG      | CTAGCGGGACGAAGGCACGC     |
| Mtmr10       | CCGCCTCAGCACACCGACAG      | TGCGGTGCTGCCTCAGCATC     |
| Ndufb4       | ACCAGAAGGGCGCAGGTCTGA     | CGACACCGCTTTGGGGTCGT     |
| NRG1         | TCCGGCAGAGCCTTCGGTCA      | TCTCCGCTAGCCTCGGTGCG     |
| Nrg1 (Type1) | GGGAATGAGCTGAACCGTAG      | ACAATGGTGATGTTGGCAGA     |
| Nrg1 (Type3) | TGCATTGCTGGCCTAAAGTG      | GTTCTTCCGGGTGGGTACTG     |
| Pfkfb3       | ACCATTGAGACCGCGGAGGC      | TCCGGGAGCTCTTATGTTCTCTGA |
| Plb1         | ATGGCATGGTGGGAACAGAAGCCAC | ACCGGGGACACACCTGGGTAC    |
| Pldn         | GCGCCCACTGCGGGGATATG      | TGTCGCTTACGCCCGCGTG      |
| PPARg        | CACAATGCCATCAGGTTTGG      | GCTGCTGCATATCATCTGGAGATC |
| Prkar2b      | GCTGTGCTCGCTCTGCTGCTG     | GTGCCTCAGCACCTCCACCG     |
| Rbbp8        | ACGGCAGCCTTACAACGCGG      | ACCACGAGGGCTCTTGTGCGAG   |
| Slc24a3      | TCCACCCAAAGCGTCCGTG       | TGTCGTCCCTCCGGGTTCCG     |
| Slc33a1      | AGCGACCACTCTCTCCGCGT      | GGGCCTGAGGCTGGCGTTTT     |
| Tshz1        | TTGTGAGGTTGACGTTGGCGAGA   | CGGACATTACTGGGTGGGCG     |
| Zmynd11      | AGCAAAGTGCCGAGCGGGTC      | TGGAGGCGAGACCCGAGACA     |
| EGFR         | TGCCACCTATGCCACGCCAAC     | ATCCCAAGGGCCACCACCACT    |
| HER2         | GCAACTGTGGTGGGCGTCCT      | CAGCTCCACTGGGCGTCAGC     |
| HER3         | CACGGGGGCGTCAAACGTCA      | GAGAGCGGGGTGACGGGAGT     |
| CyclinD1     | AGCCTCCAGAGGGCTGTCCG      | GGCTGTGGTCTCGGTTGGGC     |
| 36B4         | GGCATGCGGCCCGTGTCTC       | CTTCCCTGGGCATCACGGCG     |
| β-actin      | CCACACCCGCCACCACTTCG      | TACAGCCCGGGGAGCATCGT     |
